# Supplementary material
Source: PubMed Central journal article supplement (PMC7449745)
Supplement: boe-11-8-4509-s001.pdf [file boe-11-8-4509-s001.pdf]

## Evaluating $\beta$ -amyloidosis progression in Alzheimer's disease with Mueller polarimetry: supplement

**MARIIA BOROVKOVA,<sup>1,11</sup>  ALEXANDER BYKOV,<sup>1</sup>  ALEXEY POPOV,<sup>2</sup>  ANGELO PIERANGELO,<sup>3</sup> TATIANA NOVIKOVA,<sup>3</sup>  JENS PAHNKE,<sup>4,5,6</sup> AND IGOR MEGLINSKI<sup>1,7,8,9,10,12</sup> **

<sup>1</sup>*Optoelectronics and Measurement Techniques, University of Oulu, 90570 Oulu, Finland*

<sup>2</sup>*VTT Technical Research Centre of Finland, 90590 Oulu, Finland*

<sup>3</sup>*LPICM, Ecole polytechnique, CNRS, Institut Polytechnique de Paris, 91764 Palaiseau, France*

<sup>4</sup>*Department of Neuro-/Pathology, University of Oslo & Oslo University Hospital, 0450 Oslo, Norway*

<sup>5</sup>*LIED, University of Lübeck, 23562 Lübeck, Germany*

<sup>6</sup>*Department of Pharmacology, Medical Faculty, University of Latvia, Riga 1586, Latvia*

<sup>7</sup>*Laboratory of Biophotonics, National Research Tomsk State University, Tomsk, Russia*

<sup>8</sup>*Institute of Engineering Physics for Biomedicine, National Research Nuclear University (MEPhI), Moscow 115409, Russia*

<sup>9</sup>*Department of Histology, Cytology and Embryology, Institute of Clinical Medicine N.V. Sklifosovsky, I.M. Sechenov First Moscow State Medical University, Moscow 119146, Russia*

<sup>10</sup>*College of Engineering and Physical Sciences, Aston University, Birmingham B4 7ET, United Kingdom*

<sup>11</sup>*mariia.borovkova@oulu.fi*

<sup>12</sup>*igor.meglinski@oulu.fi*

---

This supplement published with The Optical Society on 21 July 2020 by The Authors under the terms of the [Creative Commons Attribution 4.0 License](https://creativecommons.org/licenses/by/4.0/) in the format provided by the authors and unedited. Further distribution of this work must maintain attribution to the author(s) and the published article's title, journal citation, and DOI.

Supplement DOI: <https://doi.org/10.6084/m9.figshare.12616568>

Parent Article DOI: <https://doi.org/10.1364/BOE.396294>

## Evaluating $\beta$ -amyloidosis Progression in Alzheimer's Disease with Mueller Polarimetry: supplemental document

The separate images of m22, m33, m44 elements presented in Fig. 3 of the main text of the paper are shown in Fig. S1-S3.

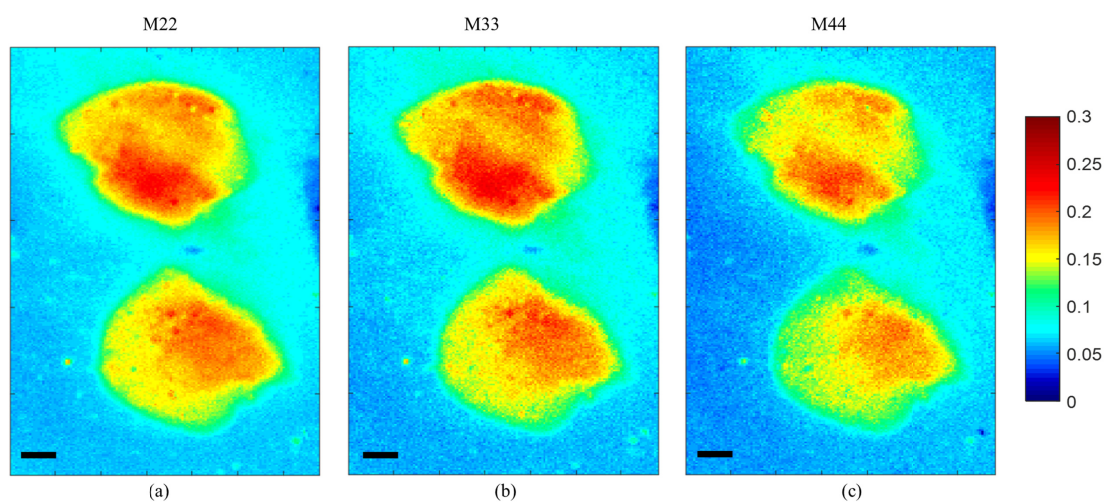

Fig. S1. Images of m22 (a), m33 (b), m44 (b) elements obtained at 450 nm. Scale: 1 mm.

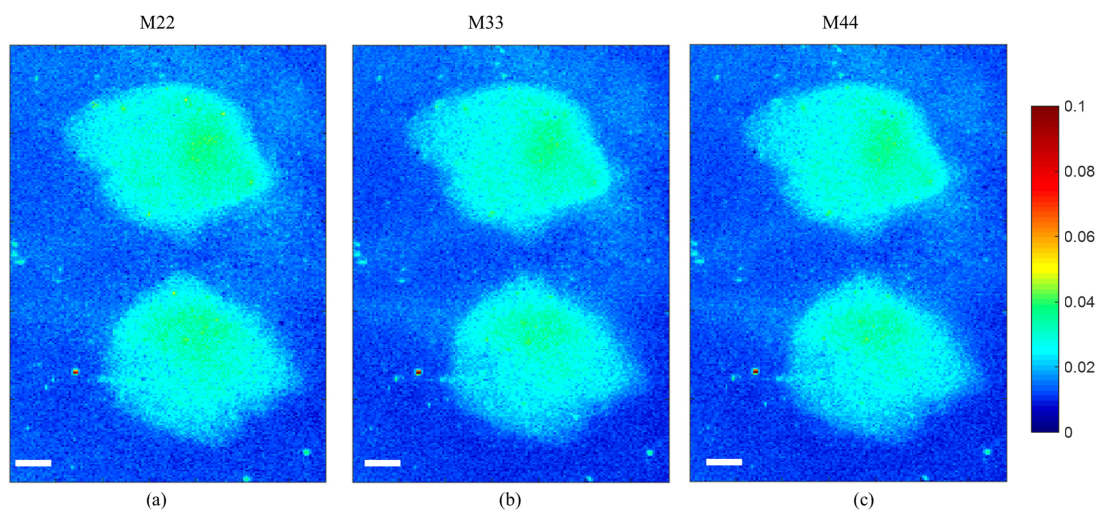

Fig. S2. Images of m22 (a), m33 (b), m44 (b) elements obtained at 500 nm. Scale: 1 mm.

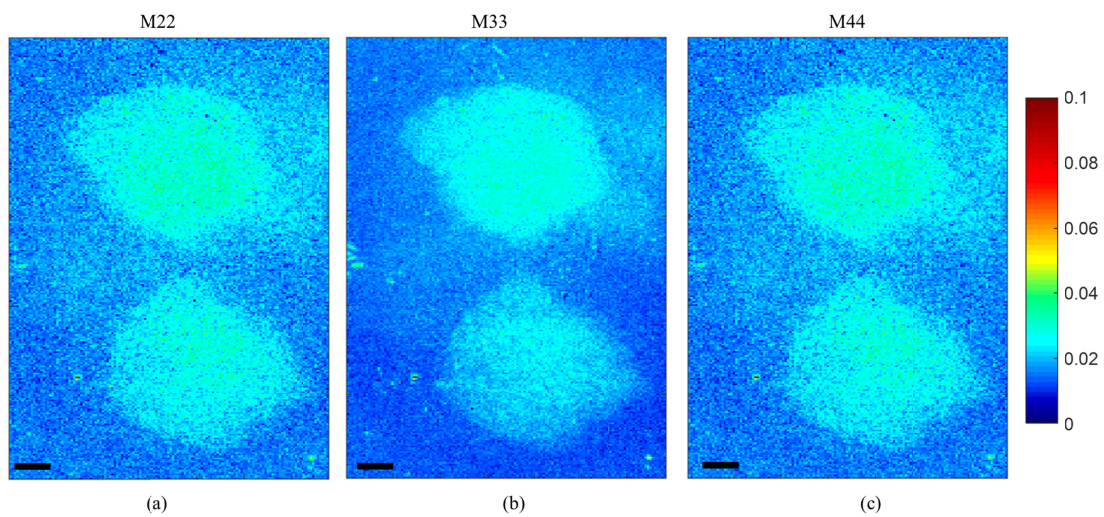

Fig. S3. Images of m22 (a), m33 (b), m44 (b) elements obtained at 550 nm. Scale: 1 mm.
